# Supplementary material for: Using the tracer flux ratio method with flight measurements to estimate dairy farm CH 4 emissions in central California
Source: Copernicus journal article supplement (doi:10.5194/amt-2018-356), 2018-11-12
Supplement: Supplementary file 1 [file SM Dataset.xlsx]

## Sheet: Dairy 2
Plume ID	Site ID	Source Designation	Measurement Duration (s)	CH4 Emission Rate (kg hr-1)	Plane Altitude (m)	Plane-Tracer Release Distance (km)	Wind Direction (degrees)	Wind Speed (m s-1)	CH4/C2H6 (R2)
5	Dairy 2	Whole site	24	146.7	269.3	1.2	341.7	4.9	0.77
7	Dairy 2	Whole site	24	189.3	367.1	1.3	338.9	4.8	0.78
10	Dairy 2	Whole site	25	194.2	532.9	1.4	332.9	5.9	0.87
12	Dairy 2	Whole site	32	100.7	558.3	1.4	337.8	6.5	0.86
14	Dairy 2	Whole site	21	163.1	550.4	1.4	338.7	5	0.75
16	Dairy 2	Whole site	28	163.4	524.6	1.3	330.7	5.6	0.78
18	Dairy 2	Cows	40	65.1	491.2	1.2	340.5	6.1	0.59
20	Dairy 2	Whole site	21	63.5	467.3	1.4	336	5.8	0.87
22	Dairy 2	Whole site	25	103.7	235.4	1.2	331.8	5	0.93
23	Dairy 2	Whole site	22	110.3	212.2	1.3	331.9	5.2	0.8
28	Dairy 2	Whole site	19	116.1	269.4	1.9	264.8	4.7	0.81
29	Dairy 2	Whole site	48	232.1	526.2	1.7	339.5	4.5	0.91
31	Dairy 2	Whole site	11	153	607.4	1.8	339.5	3.7	0.6
33	Dairy 2	Whole site	29	268.3	661.7	1.9	331.5	4.1	0.78
39	Dairy 2	Whole site	27	219.1	737.4	1.8	319.9	3.6	0.72
42	Dairy 2	Whole site	25	67.4	672.2	1.9	332.2	4.7	0.62
52	Dairy 2	Cows	15	36.3	120.9	1.3	344.8	4	0.54
55	Dairy 2	Cows	9	80.6	145.6	1.3	337.5	5.7	0.81
60	Dairy 2	Cows	10	21.6	271	1.4	338.5	5.6	0.9
62	Dairy 2	Cows	11	40.6	329.9	1.4	346.4	5.8	0.83
68	Dairy 2	Cows	14	34.2	533.7	1.4	243.2	6.3	0.88
88	Dairy 2	Lagoon	19	207.9	386.8	1	315.9	7.3	0.63
101	Dairy 2	Cows	12	108.8	121.9	1.3	352	4.4	0.56
103	Dairy 2	Cows	8	124.1	177.5	1.4	345.3	4.7	0.87
117	Dairy 2	Cows	16	94.9	531.9	1	298.6	5.5	0.64
119	Dairy 2	Lagoon	18	241.9	505.3	0.7	294.9	5.3	0.62
127	Dairy 2	Whole site	23	84.4	214.1	1.2	200.4	3.3	0.63
128	Dairy 2	Whole site	26	128.3	179.5	1.2	192.9	3.3	0.65
129	Dairy 2	Whole site	26	67	153	1.2	137.3	2.9	0.56
132	Dairy 2	Whole site	26	237.3	238.5	1.4	281.7	3.3	0.78
138	Dairy 2	Whole site	27	274.3	242.7	1.4	123.3	3.1	0.68
140	Dairy 2	Cows	28	100.8	308.8	1.4	273.5	3.1	0.53
141	Dairy 2	Whole site	28	183.9	336.5	1.4	155.4	3.1	0.77
143	Dairy 2	Cows	34	48.3	427.6	1.4	297.6	3.6	0.69
147	Dairy 2	Whole site	35	124.8	592	1.4	323.7	4.7	0.61
173	Dairy 2	Lagoon	13	221.2	527	1	314.4	4.2	0.74
201	Dairy 2	Lagoon	20	189.9	294.5	0.7	147.8	5.7	0.66
214	Dairy 1	Cows	22	115	208.4	0.9	253.7	3.2	0.85
216	Dairy 1	Cows	18	115.3	274	1	303.6	2.7	0.58
217	Dairy 1	Cows	25	122.7	310.4	0.9	331.9	3.1	0.85
218	Dairy 1	Whole site	24	252.3	348.7	0.9	326.2	3	0.84
219	Dairy 1	Cows	31	102.5	372.6	0.8	334.3	2.6	0.75
222	Dairy 1	Cows	15	112.7	439.1	1	333.2	2.6	0.76
232	Dairy 1	Cows	20	71.4	543.9	1	328.9	1.5	0.72
236	Dairy 1	Cows	19	111.8	511.3	1	307.3	1.5	0.82
237	Dairy 1	Cows	26	81.5	507.7	1.1	309.1	2.2	0.82
238	Dairy 1	Cows	14	83	508.9	1.3	248.9	1.8	0.9
241	Dairy 1	Cows	16	93	485.2	0.9	309.1	1.6	0.71
243	Dairy 1	Whole site	7	157.7	478.6	1.3	317.7	2.6	0.82
245	Dairy 1	Cows	38	130.6	438.1	1	281.8	2.1	0.85
246	Dairy 1	Cows	37	126.7	408.7	1	307.5	2	0.57
250	Dairy 1	Whole site	22	210.9	282.4	1.1	301.4	1.7	0.53
254	Dairy 1	Whole site	28	190.4	160.8	1	237.8	1.5	0.53
255	Dairy 1	Cows	27	152.1	122.5	1	195	1.2	0.68
256	Dairy 1	Whole site	33	203.5	103.1	1	204.5	1.5	0.88
257	Dairy 1	Whole site	31	285.1	99.5	1	218.3	1.7	0.8
258	Dairy 1	Whole site	32	284.3	124.2	1	234.6	1.5	0.73
259	Dairy 1	Cows	36	139.7	189.8	0.9	281.4	1.7	0.71
260	Dairy 1	Cows	26	151.1	186.2	1	262	1.7	0.79
261	Dairy 1	Cows	33	124.3	258.9	1	301.8	1.6	0.8
298	Dairy 1	Cows	20	59.2	380.5	0.9	224.4	4	0.57
299	Dairy 1	Cows	20	85	415.7	0.9	216.4	4.6	0.89
300	Dairy 1	Cows	15	22.5	445.8	1	216.9	4	0.95
301	Dairy 1	Cows	17	91.1	488.9	1	218.4	5	0.61
310	Dairy 1	Cows	17	32.8	288.6	0.9	216.7	6	0.57
312	Dairy 1	Cows	19	94.3	236.3	0.8	216.3	5.5	0.52
313	Dairy 1	Cows	20	106	218.7	0.9	216.9	5.9	0.88
317	Dairy 1	Cows	20	50.9	153.8	0.8	209.8	5.7	0.56
325	Dairy 1	Whole site	12	453.6	111.2	1.7	205.3	5.6	0.78
327	Dairy 1	Cows	19	51.9	118.3	1.1	215	6.1	0.65
328	Dairy 1	Whole site	28	342.2	98.1	0.9	217.9	5.9	0.69
330	Dairy 1	Cows	16	62.3	147.8	1	220.8	6.3	0.85
331	Dairy 1	Cows	26	41.9	148.7	0.9	220.4	5.8	0.73
332	Dairy 1	Cows	16	31.4	183.1	1.2	218.5	6.2	0.76
333	Dairy 1	Cows	18	31.9	213.6	0.9	223.8	5.7	0.79
334	Dairy 1	Cows	15	29.4	245.1	1.1	223.6	6.2	0.91
335	Dairy 1	Cows	20	32.4	283.1	1	224.3	5.7	0.74
336	Dairy 1	Cows	19	54.6	320	1	223.9	5.5	0.8
337	Dairy 1	Cows	15	81.4	346	1.1	225.9	5.5	0.88
338	Dairy 1	Cows	17	16.9	447.7	1	238.1	5.2	0.76
343	Dairy 1	Cows	20	23.5	251.5	1	215.8	5.7	0.77
351	Dairy 1	Cows	10	22.1	135.7	0.7	222.5	6	0.63
356	Dairy 1	Cows	20	37	112.8	1	220.3	5.1	0.91
369	Dairy 1	Cows	13	21	103.2	0.4	212.6	7.3	0.81
382	Dairy 1	Whole site	34	221.3	273.1	1.5	332	3.8	0.66
383	Dairy 1	Whole site	35	235	308.6	1.5	330.1	3.7	0.94
384	Dairy 1	Whole site	36	221.2	339.2	1.4	326.1	3.7	0.86
385	Dairy 1	Whole site	36	160.5	377.9	1.5	333.3	4.1	0.85
387	Dairy 1	Whole site	31	219.5	439.2	1.6	314.6	4.7	0.85
405	Dairy 1	Whole site	22	190.7	185.3	0.6	221.2	2	0.91
406	Dairy 1	Cows	23	81.8	216.7	0.7	219.3	2.2	0.51
407	Dairy 1	Cows	20	63.8	250.3	0.7	208.3	2.4	0.94
413	Dairy 1	Whole site	23	213.6	408.2	0.7	204.2	1.7	0.93
414	Dairy 1	Whole site	29	263.6	448.2	0.7	221.2	1.6	0.93
424	Dairy 1	Cows	26	74.5	844.7	1.2	255.3	2	0.69
435	Dairy 1	Cows	20	78.6	570.4	0.9	210.5	2.2	0.87
474	Dairy 1	Whole site	23	284.7	122.4	0.9	201.5	4.5	0.96
482	Dairy 1	Whole site	21	241.3	115.4	0.7	194.9	4.7	0.71
